# Supplementary material for: Do Poor Diet and Lifestyle Behaviors Modify the Genetic Susceptibility to Impulsivity in the General Population?
Source: MDPI journal article supplement (doi:10.3390/nu15071625), 2023-03-27
Supplement: s1 [file s1]

**Table S1.** Pearson's correlations between the four indicators of dietary habits

|        | LLDS-I | KCAL  | SUGAR   | FAT |
|--------|--------|-------|---------|-----|
| LLDS-I | 1      |       |         |     |
| KCAL   | 0.185  | 1     |         |     |
| SUGAR  | 0.409  | 0.135 | 1       |     |
| FAT    | 0.253  | 0.208 | -0.254* | 1   |

LLDS-I represents the inverted Lifelines Diet Score, higher LLDS-I means poor overall diet quality; KCAL, Energy intake ratio; FAT, Fat intake ratio; SUGAR, Free sugar intake ratio.

\* a negative correlation arises as both percentages are relative to total energy intake, i.e. they add up (together with percentage carbohydrates and percentage alcohol) to 100%.

**Table S2.** Gene-environment correlations between the PRS and diet/other lifestyles.

|                        | Correlation r | P value               |
|------------------------|---------------|-----------------------|
| <b>Diet</b>            |               |                       |
| Overall diet quality   | 0.015         | 0.006                 |
| Intake of energy       | -0.031        | $1.14 \times 10^{-8}$ |
| Intake of sugar        | 0.022         | $7.65 \times 10^{-5}$ |
| Intake of fat          | 0.018         | 0.001                 |
| <b>Other lifestyle</b> |               |                       |
| MVPA                   | -0.002        | 0.740                 |
| Sleep hours            | -0.014        | 0.012                 |
| Alcohol intake         | 0.007         | 0.189                 |
| Smoking                | Beta          |                       |
| Past                   | 0.109         | $< 2 \times 10^{-16}$ |
| Current                | 0.202         | $< 2 \times 10^{-16}$ |

MVPA indicates minutes per week spent in moderate-to-vigorous physical activity.

**Table S3.** Sensitivity analyses results of energy intake and its interaction with the PRS after including the interactions between energy intake and all four SES indices.

|                                         | B (95% CI)            | P Value | Beta  |
|-----------------------------------------|-----------------------|---------|-------|
| <b>Intake of energy (KCAL) (ref=Q1)</b> |                       |         |       |
| KCAL Q2                                 | 0.075 (-0.038, 0.189) | 0.194   | 0.036 |
| KCAL Q3                                 | 0.148 (0.034, 0.263)  | 0.011   | 0.071 |
| ADHD PRS                                | 0.009 (-0.009, 0.026) | 0.331   | 0.009 |
| ADHD PRS×KCAL Q2                        | 0.032 (0.008, 0.056)  | 0.010   | 0.018 |
| ADHD PRS×KCAL Q3                        | 0.036 (0.012, 0.061)  | 0.003   | 0.021 |

Q1 indicates tertile 1; Q2, tertile 2; Q3, tertile 3. ADHD PRS×variable represents the interaction term between ADHD PRS and the variable.
